# Supplementary material for: Detection of SARS-CoV-2 antibodies formed in response to the BNT162b2 and mRNA-1237 mRNA vaccine by commercial antibody tests
Source: medRxiv preprint, doi:10.1101/2021.03.30.21254604, version 1 (2021-04-06)
Supplement: STROBE checklist [file 254604_file07.docx]

**STROBE CHECKLIST**

**Source of STROBE checklist:** [**https://www.strobe-statement.org/fileadmin/Strobe/uploads/checklists/STROBE_checklist_v4_cohort.pdf**](https://www.strobe-statement.org/fileadmin/Strobe/uploads/checklists/STROBE_checklist_v4_cohort.pdf)

**Manuscript title:**

**Detection of SARS-CoV-2 antibodies formed in response to the BNT162b2 and mRNA-1237 mRNA vaccine by commercial antibody tests**

| Section | Description | Location in Manuscript |
| --- | --- | --- |
| Title and Abstract | (a) Indicate the study’s design with a commonly used term in the title or the abstract (b) Provide in the abstract an informative and balanced summary of what was done and what was found | Pages 1, 2, 3 |
| **Introduction** |  |  |
| Background and rationale | Explain the scientific background and rationale for the investigation being reported | Pages 4-5 |
| Objectives | State specific objectives, including any prespecified hypotheses | Pages 4-5 |
| **Methods** |  |  |
| Study design | Present key elements of study design early in the paper | Pages 5-7 |
| Setting | Describe the setting, locations, and relevant dates, including periods of recruitment, exposure, follow-up, and data collection | Pages 5-6 |
| Participants | Give the eligibility criteria, and the sources and methods of selection of participants. Describe methods of follow-up | Pages 5-6 |
| Variables | Clearly define all outcomes, exposures, predictors, potential confounders, and effect modifiers. Give diagnostic criteria, if applicable | Page 7 |
| Data sources | For each variable of interest, give sources of data and details of methods of assessment (measurement). Describe comparability of assessment methods if there is more than one group | Page 7 |
| Bias | Describe any efforts to address potential sources of bias | Page 7; Limitations section of discussion (pages 14-15). |
| Study size | Explain how the study size was arrived at | Page 7-8 |
| Quantitative analysis | Explain how quantitative variables were handled in the analyses. If applicable, describe which groupings were chosen and why | Page 7 |
| Statistical methods | Describe all statistical methods | Page 7 |
| **Results** |  |  |
| Participants | (a) Report numbers of individuals at each stage of study—eg numbers potentially eligible, examined for eligibility, confirmed eligible, included in the study, completing follow-up, and analysed (b) Give reasons for non-participation at each stage (c) Consider use of a flow diagram | Pages 7-8 |
| Descriptive data | (a) Give characteristics of study participants (eg demographic, clinical, social) and information on exposures and potential confounders (b) Indicate number of participants with missing data for each variable of interest (c) Summarise follow-up time (eg, average and total amount) | Table 1 |
| Outcome data | Report numbers of outcome events or summary measures over time | Pages 8-10, Table 2; Figures 1+2 |
| Main results | (a) Give unadjusted estimates and, if applicable, confounder-adjusted estimates and their precision (eg, 95% confidence interval). Make clear which confounders were adjusted for and why they were included (b) Report category boundaries when continuous variables were categorized (c) If relevant, consider translating estimates of relative risk into absolute risk for a meaningful time period | Pages 8-10, Table 2; Figures 1+2 |
| Other analyses | Report other analyses done—eg analyses of subgroups and interactions, and sensitivity analyses | Supplemental material |
| **Discussion/Interpretation** |  |  |
| Key results | Summarise key results with reference to study objectives | Page 10 |
| Limitations | Discuss limitations of the study, taking into account sources of potential bias or imprecision. Discuss both direction and magnitude of any potential bias | Pages 14-15 |
| Interpretation | Give a cautious overall interpretation of results considering objectives, limitations, multiplicity of analyses, results from similar studies, and other relevant evidence | Pages 10-14 |
| Generalisability | Discuss the generalisability (external validity) of the study results | Pages 10-14 |
| **Other** |  |  |
| Funding | Give the source of funding and the role of the funders for the present study and, if applicable, for the original study on which the present article is based | Declarations |
