# Supplementary material for: Detection of SARS-CoV-2 antibodies formed in response to the BNT162b2 and mRNA-1237 mRNA vaccine by commercial antibody tests
Source: bioRxiv or medRxiv preprint supplement (doi:10.1101/2021.03.30.21254604), 2021-04-06
Supplement: Supplementary file [file media-1.pdf]

## Supplementary information – Table of contents

**Table S1.** Commercial products used in this study.

**Table S2.** Anti-Nucleocapsid IgG detection in relation to history of confirmed laboratory diagnosis of SARS-CoV-2 infection in participants of BNT162b2 group (n = 6).

**Table S3.** Anti-Nucleocapsid IgG detection in relation to history of confirmed laboratory diagnosis of SARS-CoV-2 infection in participants of mRNA-1273 group (n = 16).

**Table S4.** Comparison of mean titers in mRNA-1273 group participants based on a history of previous COVID-19.

**Table S5.** Quantitative titers on each assay in patients on biologics/immunosuppressants.

**Fig. S1.** Box-whisker plots demonstrating the spread of only positive quantitative (titer) results for each vaccine group for the (a) RBD IgG assay; (b) Trimeric S IgG assay; and (c) nAb assay.

**Table S1.** Commercial products used in this study.

| Item                                 | Description                                                                                                     | Commercial affiliation                                    |
|--------------------------------------|-----------------------------------------------------------------------------------------------------------------|-----------------------------------------------------------|
| BNT162b2 vaccine                     | mRNA vaccine                                                                                                    | Pfizer<br>(New York, NY, USA)                             |
| mRNA-1273 vaccine                    | mRNA vaccine                                                                                                    | Moderna Messenger<br>Therapeutics<br>(Cambridge, MA, USA) |
| Serology assay<br>(Abbott Architect) | SARS-CoV-2 IgG targeting<br>the nucleocapsid protein                                                            | Abbott<br>(Chicago, IL, USA)                              |
| Serology assay<br>(Abbott Architect) | SARS-CoV-2 IgG targeting<br>the receptor binding domain<br>(RBD)                                                | Abbott<br>(Chicago, IL, USA)                              |
| Serology assay<br>(DiaSorin Liaison) | SARS-CoV-2 IgG targeting<br>the S1/S2 regions of the<br>spike protein                                           | DiaSorin<br>(Saluggia, Italy)                             |
| Serology assay<br>(manual assay)     | SARS-CoV-2 neutralizing<br>antibody (nAb) preventing<br>RBD and angiotensin-<br>converting enzyme 2 (ACE-<br>2) | GenScript<br>(Piscataway, NJ, USA)                        |
| Electronic medical record<br>(EMR)   | Epic EMR                                                                                                        | Epic<br>(Verona, WI, USA)                                 |
| Statistical software                 | Stata Version 16.1                                                                                              | StataCorp<br>(College Station, TX, USA)                   |

**Table S2.** Anti-Nucleocapsid IgG detection in relation to history of confirmed laboratory diagnosis of SARS-CoV-2 infection in participants of BNT162b2 group (n = 6).

| Case                | Days between COVID-19 diagnosis and first vaccine dose <sup>a</sup> | Anti-N IgG result at baseline <sup>b</sup> | Anti-N IgG result 2-weeks post first dose of vaccine | Anti-N IgG result prior to second dose of vaccine |
|---------------------|---------------------------------------------------------------------|--------------------------------------------|------------------------------------------------------|---------------------------------------------------|
| Case 1              | 27                                                                  | +                                          | +                                                    | ND                                                |
| Case 2              | 45                                                                  | +                                          | +                                                    | +                                                 |
| Case 3              | 46                                                                  | +                                          | -                                                    | ND                                                |
| Case 4              | 118                                                                 | +                                          | +                                                    | ND                                                |
| Case 5              | -7                                                                  | -                                          | ND                                                   | +                                                 |
| Case 6 <sup>c</sup> | -34                                                                 | -                                          | -                                                    | -                                                 |

Abbreviations: ND – not done; + positive; - negative

<sup>a</sup>A negative value refers to the diagnosis of COVID-19 being made after the first dose of vaccine. All SARS-CoV-2 diagnosis were confirmed using PCR testing from a nasopharyngeal or oropharyngeal swab collected due to symptoms.

<sup>b</sup>Qualitative results on the RBD IgG, Trimeric S IgG, and GenScript nAb assays were concordant with the Anti-N IgG result at baseline for all six cases.

<sup>c</sup>Confirmed COVID-19 positive nine days after second dose of BNT162b2 vaccine.

**Table S3.** Anti-Nucleocapsid IgG detection in relation to history of confirmed laboratory diagnosis of SARS-CoV-2 infection in participants of mRNA-1273 group (n = 16).

| Case    | Days between COVID-19 diagnosis and first vaccine dose <sup>a</sup> | Anti-N IgG result 2-weeks post first vaccine dose <sup>b</sup> | Anti-N IgG result prior to 2 <sup>nd</sup> dose of vaccine <sup>b</sup> |
|---------|---------------------------------------------------------------------|----------------------------------------------------------------|-------------------------------------------------------------------------|
| Case 1  | 18                                                                  | +                                                              | ND                                                                      |
| Case 2  | 18                                                                  | ND                                                             | ND                                                                      |
| Case 3  | 22                                                                  | ND                                                             | ND                                                                      |
| Case 4  | 27                                                                  | +                                                              | +                                                                       |
| Case 5  | 34                                                                  | ND                                                             | +                                                                       |
| Case 6  | 35                                                                  | ND                                                             | ND                                                                      |
| Case 7  | 41                                                                  | ND                                                             | -                                                                       |
| Case 8  | 41                                                                  | ND                                                             | ND                                                                      |
| Case 9  | 45                                                                  | +                                                              | +                                                                       |
| Case 10 | 45                                                                  | ND                                                             | ND                                                                      |
| Case 11 | 48                                                                  | ND                                                             | ND                                                                      |
| Case 12 | 73                                                                  | +                                                              | +                                                                       |
| Case 13 | 73                                                                  | +                                                              | -                                                                       |
| Case 14 | 73                                                                  | -                                                              | -                                                                       |
| Case 15 | 76                                                                  | +                                                              | -                                                                       |
| Case 16 | 76                                                                  | ND                                                             | +                                                                       |

Abbreviations: ND – not done due to shortage of assay reagents ; + positive; - negative

<sup>a</sup>All SARS-CoV-2 diagnosis were confirmed using PCR testing from a nasopharyngeal or oropharyngeal swab collected due to symptoms.

<sup>b</sup>All of these patients were found to be positive in one or more of either RBD IgG, Trimeric S IgG, or nAb titer.

**Table S4.** Comparison of median titers (IQRs) in mRNA-1273 group participants based on a history of previous COVID-19.

| Time point                       | Assay                  | COVID-19 Recovered                         | No prior history of COVID-19      | p-value |
|----------------------------------|------------------------|--------------------------------------------|-----------------------------------|---------|
| 2-weeks post first vaccine dose  | Trimeric S-IgG (AU/mL) | 785<br>(640-800)<br>(n = 7)                | 14.4<br>(0-40.3)<br>(n = 25)      | 0.0002  |
|                                  | RBD IgG (AU/mL)        | 40,000<br>(28,534.6-40,000)<br>(n = 7)     | 74.7<br>(3.6-429.7)<br>(n = 25)   | <0.0001 |
|                                  | nAb (ng/mL)            | 37,672<br>(1,233.8-107,194.2)<br>(n = 7)   | 0<br>(0-189.6)<br>(n = 25)        | 0.0009  |
| Pre-2 <sup>nd</sup> vaccine dose | Trimeric S-IgG (AU/mL) | 800<br>(651-800)<br>(n = 16)               | 58.2<br>(13.8-113)<br>(n = 31)    | <0.0001 |
|                                  | RBD IgG (AU/mL)        | 40000<br>(37257.3-40000)<br>(n = 9)        | 280.9<br>(88.1-909.5)<br>(n = 28) | <0.0001 |
|                                  | nAb (ng/mL)            | 33,874.2<br>(2,179.4-48,052.8)<br>(n = 16) | 185.4<br>(0-386.2)<br>(n = 32)    | <0.0001 |

**Table S5.** Quantitative titers on each assay in patients on biologics/immunosuppressants.

| Timing of blood sample / Assay        | Participant 1 (BNT162b2) | Participant 2 (BNT162b2) | Participant 3 (BNT162b2) | Participant 4 (BNT162b2) | Participant 5 <sup>a</sup> (mRNA-1273) |
|---------------------------------------|--------------------------|--------------------------|--------------------------|--------------------------|----------------------------------------|
| Baseline blood sample                 |                          |                          |                          |                          |                                        |
| RBD IgG (AU/mL)                       | 6.8                      | 0                        | 0                        | 0                        | ND                                     |
| Trimeric S IgG (AU/mL)                | 1.9                      | 1.9                      | 1.9                      | 1.9                      | ND                                     |
| nAb (ng/mL)                           | 0                        | 0                        | 0                        | 0                        | ND                                     |
| 2-week blood sample                   |                          |                          |                          |                          |                                        |
| RBD IgG (AU/mL)                       | 270.6                    | 127.4                    | 492.9                    | 641.4                    | 7,541.3                                |
| Trimeric S IgG (AU/mL)                | 56.3                     | 17.4                     | 119                      | 139                      | 371                                    |
| nAb (ng/mL)                           | 0                        | 0                        | 477                      | 250.2                    | 2,534.2                                |
| Pre-2 <sup>nd</sup> dose blood sample |                          |                          |                          |                          |                                        |
| RBD IgG (AU/mL)                       | ND                       | 247.2                    | ND                       | 1,092.8                  | 8,210.6                                |
| Trimeric S IgG (AU/mL)                | ND                       | 23.4                     | ND                       | 162                      | 428                                    |
| nAb (ng/mL)                           | ND                       | 281.4                    | ND                       | 540.2                    | 3,020.4                                |

Abbreviations: ND – not done.

<sup>a</sup>Participant 5 is COVID-19 recovered (received first dose of mRNA-1273 vaccine 73 days post date of COVID-19 diagnosis).

**Figure S1:**

**a**

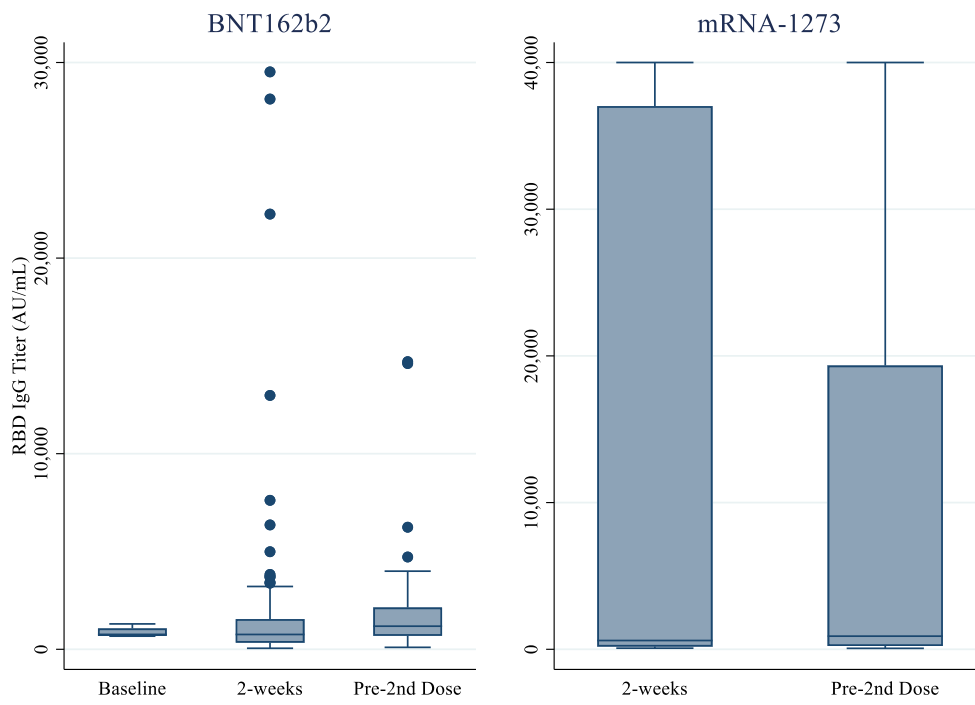

**b**

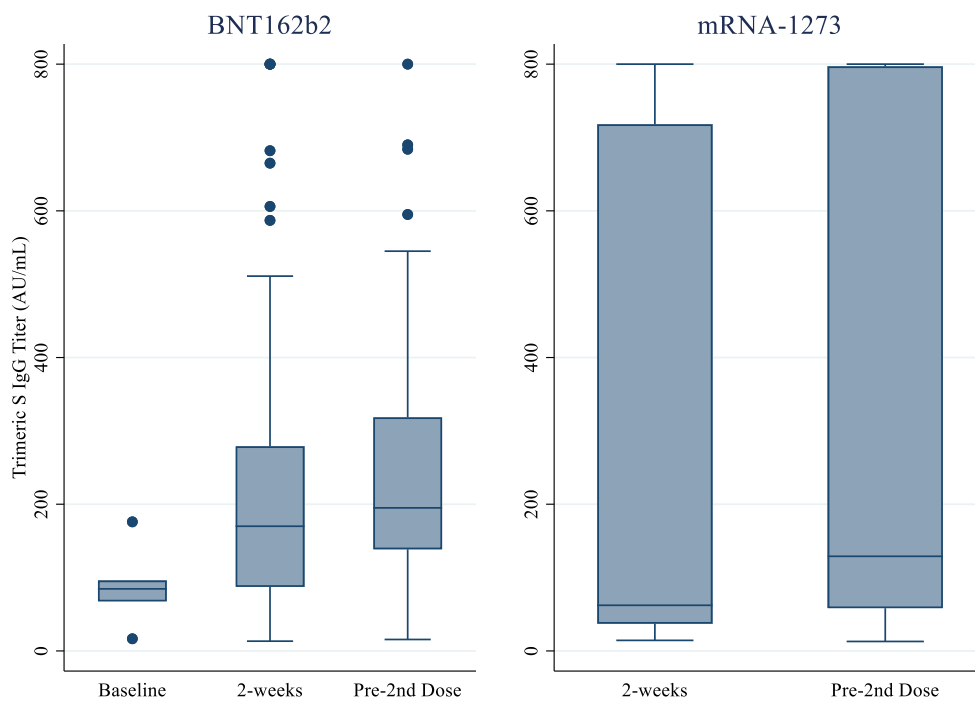

**c**

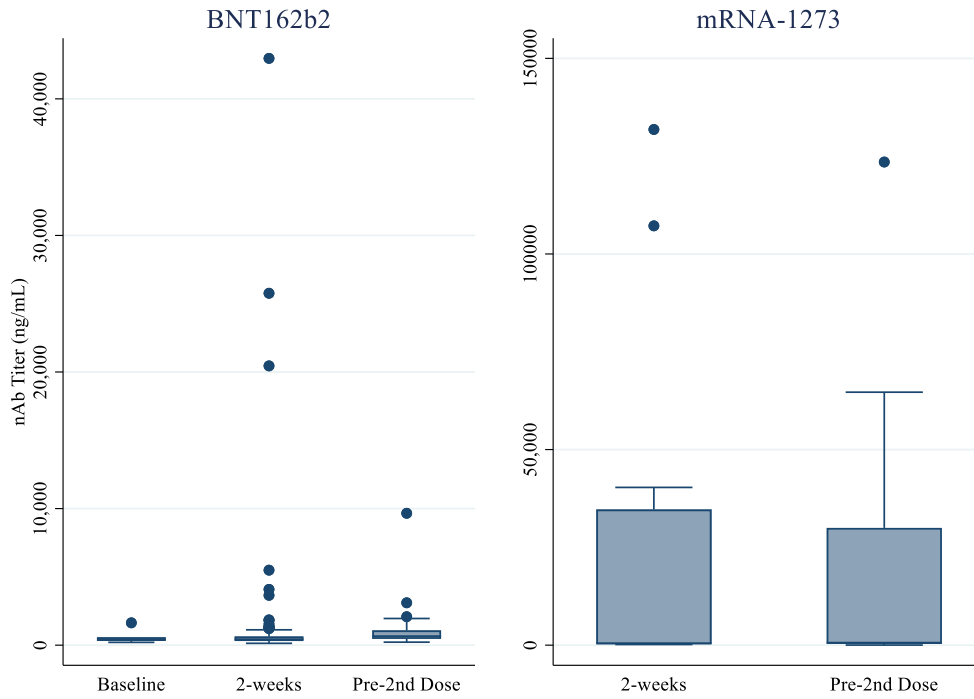

**Fig. S1.** Box-whisker plots demonstrating the spread of only positive quantitative (titer) results for each vaccine group for the (a) RBD IgG assay; (b) Trimeric S IgG assay; and (c) nAb assay.
